# Supplementary material for: Interactions of Sea Anemone Toxins with Insect Sodium Channel—Insights from Electrophysiology and Molecular Docking Studies
Source: PubMed Central journal article supplement (PMC7957711; doi:10.3390/molecules26051302), 2021-02-28
Supplement: molecules-26-01302-s001.pdf [file molecules-26-01302-s001.pdf]

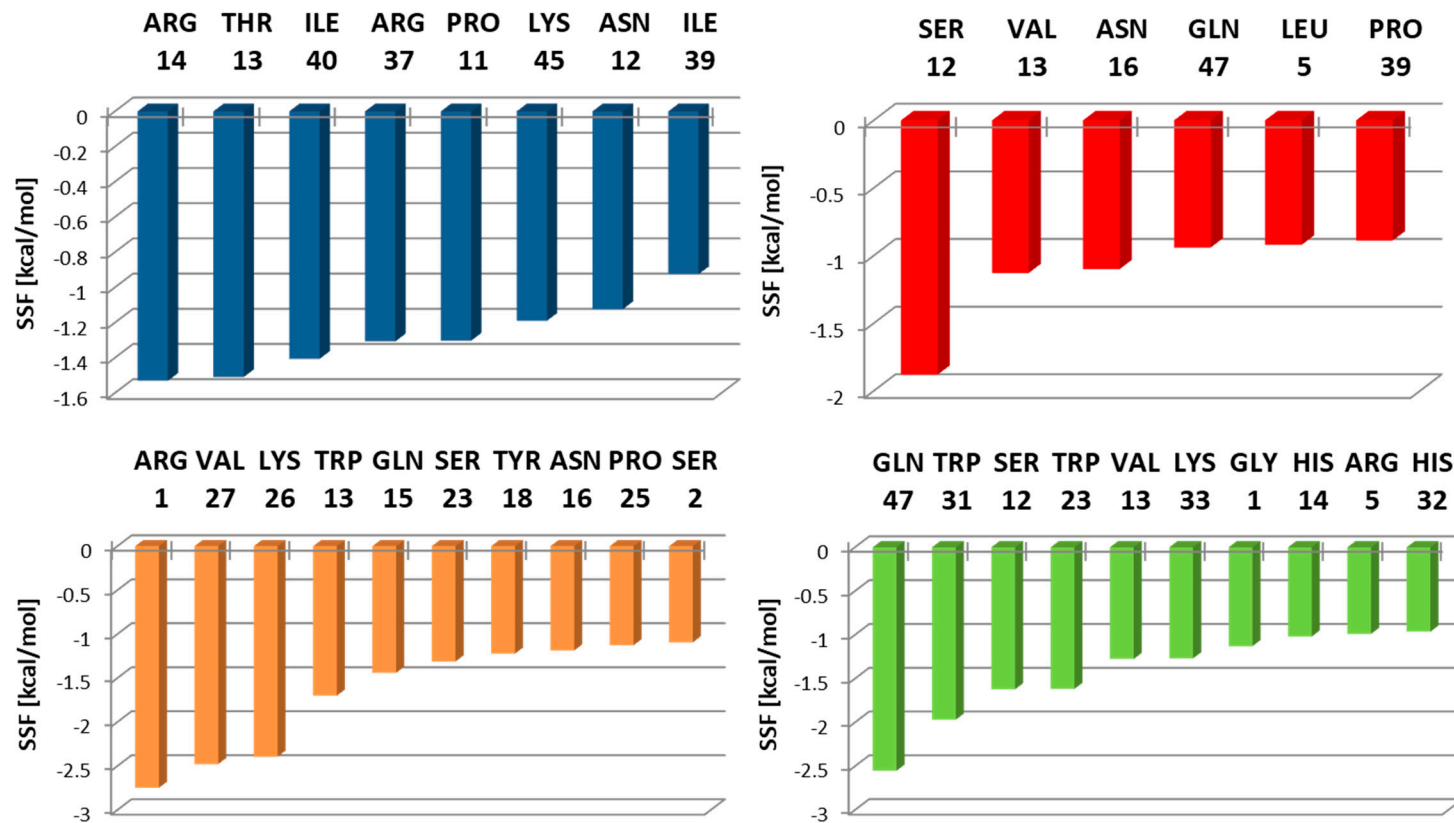

Figure S2. Contributions of toxins residues to the binding energy to NavPaS. Binding energy was calculated with Smina Scoring function (SSF) and is shown in kcal/mol. Amino acid residues of Av1 are shown in blue, Av2 – red, Av3 – orange and CgNa – green.

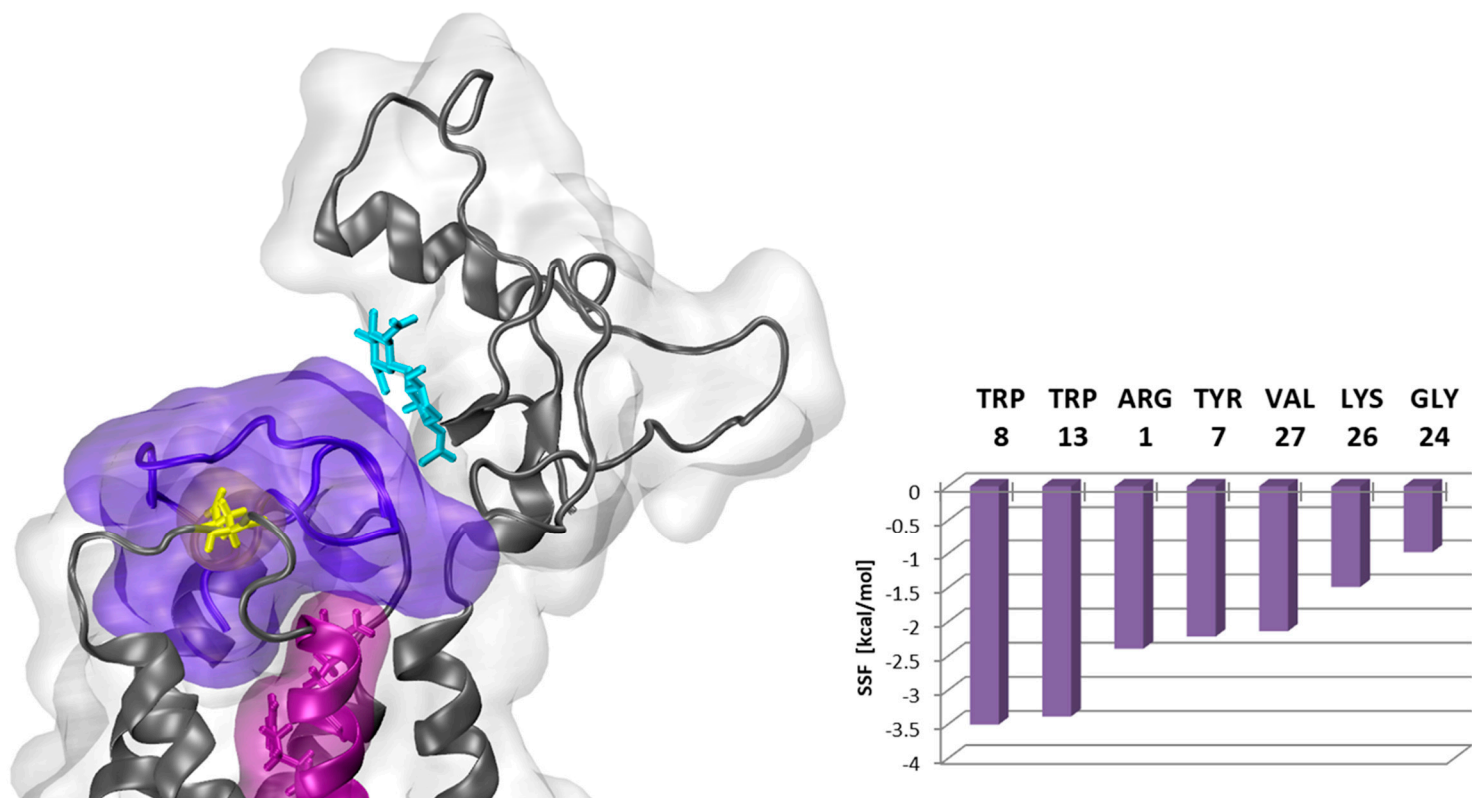

Figure S3. Binding mode of Av3 alternative pose – Av3' in the NavPaS site 3 region. Sodium channel is shown in grey (cartoon and surface representations) with voltage sensing helix S4 in purple, Glu1255 is in yellow and NAG (N-acetylglucosamine or 2-acetamino-2-deoxy-beta-D-glucopyranose) in cyan licorice representation. Av3 toxin is shown in violet cartoon and surface representation. In the right panel contributions of toxins residues to the binding energy (SSF, in kcal/mol) are shown.

Table S1a. Residue-Residue Contact Score (RRCS) values for possible toxin-NavPaS channel (amino acid residues) contacts.

| Av1             | NavPas   | RRCS  | Av2            | NavPas   | RRCS  | Av3             | NavPas   | RRCS  | Av3'            | NavPas   | RRCS | CgNa            | NavPas   | RRCS  |
|-----------------|----------|-------|----------------|----------|-------|-----------------|----------|-------|-----------------|----------|------|-----------------|----------|-------|
| $\Sigma=122.09$ |          |       | $\Sigma=85.99$ |          |       | $\Sigma=152.81$ |          |       | $\Sigma=145.91$ |          |      | $\Sigma=119.13$ |          |       |
| 40 ILE          | 303 ASP  | 14.45 | 14 ARG         | 1193 GLY | 10.30 | 1 ARG           | 331 SER  | 11.42 | 8 TRP           | 1259 ILE | 9.65 | 47 GLN          | 345 GLN  | 19.43 |
| 9 ASP           | 1255 GLU | 9.94  | 35 LYS         | 1255 GLU | 9.69  | 13 TRP          | 1257 TYR | 9.46  | 7 TYR           | 1248 LEU | 7.87 | 8 SER           | 1261 PRO | 8.00  |
| 40 ILE          | 306 TRP  | 7.72  | 16 ASN         | 345 GLN  | 6.56  | 1 ARG           | 330 ASN  | 8.74  | 1 ARG           | 1194 GLN | 7.78 | 5 ARG           | 1255 GLU | 7.76  |
| 12 ASN          | 1203 ASP | 7.20  | 22 ILE         | 1256 LYS | 5.45  | 16 ASN          | 345 GLN  | 8.22  | 26 LYS          | 1203 ASP | 7.72 | 33 LYS          | 1196 MET | 6.77  |
| 13 THR          | 1199 SER | 5.24  | 47 GLN         | 301 PHE  | 4.88  | 27 VAL          | 1190 ASP | 7.61  | 24 GLY          | 1200 GLU | 6.87 | 9 ASP           | 1255 GLU | 6.73  |
| 13 THR          | 1194 GLN | 5.18  | 5 LEU          | 1255 GLU | 4.70  | 1 ARG           | 388 ALA  | 7.00  | 9 GLY           | 1255 GLU | 6.31 | 6 CYS           | 1255 GLU | 6.48  |
| 8 SER           | 1261 PRO | 5.03  | 14 ARG         | 1192 TYR | 4.45  | 2 SER           | 1262 THR | 5.82  | 1 ARG           | 345 GLN  | 6.31 | 33 LYS          | 1199 SER | 6.38  |
| 14 ARG          | 1194 GLN | 4.24  | 40 THR         | 1252 ASP | 4.33  | 1 ARG           | 392 HID  | 5.22  | 27 VAL          | 1203 ASP | 5.89 | 5 ARG           | 1256 LYS | 6.19  |
| 45 LYS          | 1255 GLU | 4.05  | 16 ASN         | 281 MET  | 3.12  | 23 SER          | 1199 SER | 5.12  | 10 GLY          | 1255 GLU | 5.18 | 7 ASP           | 1255 GLU | 5.43  |
| 45 LYS          | 1253 VAL | 3.88  | 10 GLY         | 1261 PRO | 3.10  | 26 LYS          | 1190 ASP | 4.66  | 19 PRO          | 1255 GLU | 5.09 | 31 TRP          | 347 TYR  | 4.06  |
| 6 CYS           | 1255 GLU | 3.81  | 12 SER         | 278 GLN  | 2.97  | 1 ARG           | 387 SER  | 4.02  | 13 TRP          | 283 VAL  | 4.79 | 1 GLY           | 303 ASP  | 3.93  |
| 12 ASN          | 1199 SER | 3.31  | 14 ARG         | 1194 GLN | 2.88  | 23 SER          | 1203 ASP | 4.00  | 23 SER          | 1200 GLU | 4.06 | 32 HIS          | 1194 GLN | 3.65  |
| 7 LYS           | 1256 LYS | 3.16  | 12 SER         | 281 MET  | 2.54  | 27 VAL          | 1265 ARG | 3.88  | 1 ARG           | 1193 GLY | 4.02 | 12 SER          | 283 VAL  | 2.71  |
| 14 ARG          | 1193 GLY | 3.08  | 17 THR         | 345 GLN  | 1.99  | 26 LYS          | 1203 ASP | 3.84  | 7 TYR           | 1247 GLY | 3.66 | 47 GLN          | 1192 TYR | 2.53  |
| 14 ARG          | 281 MET  | 3.07  | 12 SER         | 1194 GLN | 1.80  | 1 ARG           | 329 GLY  | 3.81  | 7 TYR           | 1255 GLU | 3.61 | 33 LYS          | 1200 GLU | 2.52  |
| 25 PHE          | 301 PHE  | 2.77  | 15 GLY         | 1192 TYR | 1.72  | 15 GLN          | 286 GLN  | 3.76  | 8 TRP           | 1261 PRO | 3.58 | 12 SER          | 345 GLN  | 2.02  |
| 1 GLY           | 1200 GLU | 2.74  | 10 GLY         | 1265 ARG | 1.72  | 18 TYR          | 1199 SER | 3.74  | 13 TRP          | 279 ILE  | 3.13 | 14 HIS          | 392 HIS  | 1.83  |
| 14 ARG          | 1192 TYR | 2.70  | 12 SER         | 1190 ASP | 1.71  | 26 LYS          | 1202 LEU | 3.42  | 23 SER          | 1196 MET | 2.97 | 38 TYR          | 1196 MET | 1.75  |
| 9 ASP           | 1261 PRO | 2.69  | 12 SER         | 1265 ARG | 1.54  | 15 GLN          | 283 VAL  | 3.35  | 13 TRP          | 388 ALA  | 2.86 | 23 TRP          | 307 PHE  | 1.71  |
| 1 GLY           | 1196 MET | 1.84  | 47 GLN         | 303 ASP  | 1.48  | 5 PRO           | 1255 GLU | 3.14  | 24 GLY          | 1199 SER | 2.85 | 13 VAL          | 388 ALA  | 1.70  |
| 11 PRO          | 1264 LEU | 1.80  | 39 PRO         | 1254 ILE | 1.40  | 23 SER          | 1200 GLU | 3.02  | 8 TRP           | 1258 PHE | 2.73 | 16 ASN          | 1257 TYR | 1.67  |
| 39 ILE          | 306 TRP  | 1.74  | 38 GLY         | 1253 VAL | 1.40  | 24 GLY          | 1203 ASP | 2.87  | 1 ARG           | 1192 TYR | 2.64 | 33 LYS          | 1203 ASP | 1.59  |
| 15 GLY          | 1265 ARG | 1.68  | 11 PRO         | 1265 ARG | 1.16  | 22 CYS          | 1196 MET | 2.85  | 6 CYS           | 1255 GLU | 2.63 | 12 SER          | 286 GLN  | 1.51  |
| 37 ARG          | 345 GLN  | 1.64  | 13 VAL         | 1194 GLN | 0.80  | 2 SER           | 1261 PRO | 2.46  | 8 TRP           | 1255 GLU | 2.55 | 31 TRP          | 307 PHE  | 1.38  |
| 10 GLY          | 1261 PRO | 1.64  | 16 ASN         | 1192 TYR | 0.76  | 27 VAL          | 278 GLN  | 2.42  | 26 LYS          | 1200 GLU | 2.33 | 13 VAL          | 331 SER  | 1.27  |
| 14 ARG          | 1191 HIS | 1.60  | 38 GLY         | 1254 ILE | 0.71  | 20 GLU          | 1196 MET | 2.41  | 18 TYR          | 1255 GLU | 2.28 | 30 GLY          | 1193 GLY | 1.26  |

|        |          |      |        |          |      |        |          |      |        |          |      |        |          |      |
|--------|----------|------|--------|----------|------|--------|----------|------|--------|----------|------|--------|----------|------|
| 45 LYS | 1252 ASP | 1.47 | 4 CYS  | 1256 LYS | 0.69 | 3 CYS  | 1261 PRO | 2.32 | 27 VAL | 1206 ASN | 2.07 | 11 PRO | 1265 ARG | 1.25 |
| 45 LYS | 1254 ILE | 1.44 | 39 PRO | 1256 LYS | 0.64 | 1 ARG  | 286 GLN  | 2.27 | 26 LYS | 1204 TYR | 1.93 | 23 TRP | 306 TRP  | 1.15 |
| 11 PRO | 1265 ARG | 1.36 | 38 GLY | 1255 GLU | 0.49 | 26 LYS | 1268 ARG | 2.26 | 7 TYR  | 1253 VAL | 1.83 | 31 TRP | 1194 GLN | 0.71 |
| 2 ALA  | 1196 MET | 1.25 | 30 GLY | 301 PHE  | 0.26 | 15 GLN | 345 GLN  | 2.04 | 25 PRO | 1199 SER | 1.82 | 23 TRP | 303 ASP  | 0.69 |
| 8 SER  | 1255 GLU | 1.20 | 6 CYS  | 1255 GLU | 0.21 | 27 VAL | 1194 GLN | 1.75 | 11 CYS | 1261 PRO | 1.81 | 11 PRO | 1262 THR | 0.65 |
| 9 ASP  | 1253 VAL | 1.14 | 3 PRO  | 1256 LYS | 0.18 | 21 GLY | 1196 MET | 1.72 | 24 GLY | 1203 ASP | 1.77 | 5 ARG  | 1254 ILE | 0.49 |
| 18 MET | 1196 MET | 1.04 | 44 CYS | 1256 LYS | 0.17 | 18 TYR | 1194 GLN | 1.68 | 27 VAL | 1248 LEU | 1.76 | 12 SER | 279 ILE  | 0.48 |
| 41 GLY | 303 ASP  | 0.89 | 13 VAL | 281 MET  | 0.10 | 25 PRO | 1265 ARG | 1.51 | 13 TRP | 286 GLN  | 1.66 | 46 LYS | 345 GLN  | 0.48 |
| 40 ILE | 301 PHE  | 0.88 | 13 VAL | 1192 TYR | 0.09 | 8 TRP  | 1255 GLU | 1.38 | 8 TRP  | 1247 GLY | 1.57 | 24 VAL | 303 ASP  | 0.48 |
| 19 SER | 1255 GLU | 0.77 | 38 GLY | 1252 ASP | 0.01 | 26 LYS | 1206 ASN | 1.28 | 1 ARG  | 1191 HIS | 1.53 | 31 TRP | 345 GLN  | 0.46 |
| 7 LYS  | 1255 GLU | 0.73 |        |          |      | 3 CYS  | 1265 ARG | 1.19 | 25 PRO | 1203 ASP | 1.48 | 32 HIS | 1193 GLY | 0.35 |
| 34 CYS | 1255 GLU | 0.73 |        |          |      | 1 ARG  | 1262 THR | 0.85 | 24 GLY | 1196 MET | 1.19 | 13 VAL | 387 SER  | 0.33 |
| 32 ASN | 1254 ILE | 0.66 |        |          |      | 27 VAL | 281 MET  | 0.82 | 13 TRP | 387 SER  | 0.82 | 36 ASP | 1200 GLU | 0.31 |
| 11 PRO | 1261 PRO | 0.61 |        |          |      | 15 GLN | 387 SER  | 0.78 | 13 TRP | 345 GLN  | 0.80 | 16 ASN | 1256 LYS | 0.24 |
| 11 PRO | 1203 ASP | 0.55 |        |          |      | 3 CYS  | 27 VAL   | 0.67 | 20 GLU | 1251 SER | 0.76 | 16 ASN | 1255 GLU | 0.21 |
| 15 GLY | 281 MET  | 0.44 |        |          |      | 25 PRO | 1261 PRO | 0.57 | 8 TRP  | 1253 VAL | 0.73 | 11 PRO | 1261 PRO | 0.20 |
| 32 ASN | 1256 LYS | 0.39 |        |          |      | 26 LYS | 1265 ARG | 0.55 | 1 ARG  | 281 MET  | 0.49 | 7 ASP  | 1253 VAL | 0.17 |
| 33 ASN | 1256 LYS | 0.21 |        |          |      | 21 GLY | 1199 SER | 0.53 | 18 TYR | 1196 MET | 0.48 | 38 TYR | 1200 GLU | 0.07 |
| 13 THR | 1203 ASP | 0.09 |        |          |      | 1 ARG  | 334 ALA  | 0.47 | 27 VAL | 1264 LEU | 0.46 | 13 VAL | 1262 THR | 0.04 |
| 46 GLN | 1252 ASP | 0.06 |        |          |      | 15 GLN | 388 ALA  | 0.34 | 14 GLY | 345 GLN  | 0.42 | 2 VAL  | 303 ASP  | 0.04 |
|        |          |      |        |          |      | 22 CYS | 1200 GLU | 0.28 | 12 PRO | 1261 PRO | 0.42 | 14 HIS | 331 SER  | 0.03 |
|        |          |      |        |          |      | 3 CYS  | 1262 THR | 0.26 | 12 PRO | 1262 THR | 0.16 | 12 SER | 388 ALA  | 0.02 |
|        |          |      |        |          |      | 1 ARG  | 389 GLY  | 0.25 | 5 PRO  | 1255 GLU | 0.15 | 47 GLN | 344 LEU  | 0.02 |
|        |          |      |        |          |      | 26 LYS | 1199 SER | 0.23 | 25 PRO | 1196 MET | 0.13 | 32 HIS | 1195 SER | 0.01 |
|        |          |      |        |          |      | 17 CYS | 281 MET  | 0.20 | 13 TRP | 392 HIS  | 0.12 |        |          |      |
|        |          |      |        |          |      | 2 SER  | 1260 SER | 0.18 | 26 LYS | 1199 SER | 0.12 |        |          |      |
|        |          |      |        |          |      | 3 CYS  | 278 GLN  | 0.12 | 8 TRP  | 1264 LEU | 0.10 |        |          |      |
|        |          |      |        |          |      | 26 LYS | 1194 GLN | 0.05 |        |          |      |        |          |      |

Table S1b. Residue-Residue Contact Score (RRCS) values for possible toxin-NavPaS channel NAG contacts.

| Av1            | NAG      | RRCS | Av2            | NAG      | RRCS | Av3            | NAG      | RRCS | Av3'          | NAG      | RRCS | CgNa           | NAG      | RRCS |
|----------------|----------|------|----------------|----------|------|----------------|----------|------|---------------|----------|------|----------------|----------|------|
| $\Sigma=26.63$ |          |      | $\Sigma=19.93$ |          |      | $\Sigma=13.92$ |          |      | $\Sigma=2.53$ |          |      | $\Sigma=38.08$ |          |      |
| 39 ILE         | 1602 NAG | 7.40 | 19 SER         | 1602 NAG | 8.80 | 10 GLY         | 1601 NAG | 7.07 | 14 GLY        | 1601 NAG | 1.48 | 19 SER         | 1601 NAG | 7.44 |
| 37 ARG         | 1601 NAG | 5.15 | 21 ILE         | 1602 NAG | 3.85 | 15 GLN         | 1601 NAG | 2.50 | 2 SER         | 1602 NAG | 0.19 | 3 HYP          | 1602 NAG | 5.53 |
| 36 GLY         | 1602 NAG | 4.57 | 19 SER         | 1601 NAG | 2.34 | 16 ASN         | 1602 NAG | 1.87 | 13 TRP        | 1601 NAG | 0.09 | 21 THR         | 1602 NAG | 4.49 |
| 40 ILE         | 1602 NAG | 3.57 | 17 THR         | 1601 NAG | 2.27 | 16 ASN         | 1601 NAG | 1.04 | 15 GLN        | 1601 NAG | 0.14 | 47 GLN         | 1602 NAG | 3.95 |
| 37 ARG         | 1602 NAG | 2.43 | 1 GLY          | 1601 NAG | 1.32 | 14 GLY         | 1601 NAG | 0.45 | 15 GLN        | 1602 NAG | 0.00 | 1 GLY          | 1602 NAG | 3.79 |
| 41 GLY         | 1602 NAG | 2.25 | 21 ILE         | 1601 NAG | 0.46 | 9 GLY          | 1601 NAG | 0.38 | 12 PRO        | 1601 NAG | 0.62 | 19 SER         | 1602 NAG | 3.77 |
| 35 GLU         | 1601 NAG | 0.56 | 18 LEU         | 1601 NAG | 0.34 | 1 ARG          | 1601 NAG | 0.35 |               |          |      | 47 GLN         | 1601 NAG | 2.09 |
| 38 ALA         | 1602 NAG | 0.42 | 47 GLN         | 1602 NAG | 0.22 | 10 GLY         | 1602 NAG | 0.17 |               |          |      | 18 LEU         | 1602 NAG | 1.72 |
| 36 GLY         | 1601 NAG | 0.28 | 3 PRO          | 1601 NAG | 0.19 | 11 CYS         | 1601 NAG | 0.09 |               |          |      | 18 LEU         | 1602 NAG | 1.72 |
| 42 TYR         | 1602 NAG | 0.01 | 1 GLY          | 1602 NAG | 0.15 |                |          |      |               |          |      | 20 GLY         | 1602 NAG | 1.42 |
|                |          |      |                |          |      |                |          |      |               |          |      | 2 VAL          | 1602 NAG | 1.21 |
|                |          |      |                |          |      |                |          |      |               |          |      | 18 LEU         | 1601 NAG | 0.61 |
|                |          |      |                |          |      |                |          |      |               |          |      | 17 THR         | 1601 NAG | 0.20 |
|                |          |      |                |          |      |                |          |      |               |          |      | 13 VAL         | 1601 NAG | 0.13 |

## DI/SS2-S6 fragment

PaNav<sub>v</sub>1 ALRSAGPWHILFF<sup>396</sup>

DmNav<sub>v</sub>1 VLRAAGPWHMLFF<sup>409</sup>

TcNav<sub>v</sub>1 VLRAAGPWHMLFF<sup>408</sup>

DpNav<sub>v</sub>1 VLRTAGPWHMLFF<sup>325</sup>

Figure S4. Multiple sequence alignment of DI/SS2-S6 region of selected arthropod voltage-gated sodium (Nav) channels. Species abbreviations: Insects: Pa - *Periplaneta americana* (cockroach), Dm - *Drosophila melanogaster* (fruitfly), Tc - *Tribolium castaneum* (red flour beetle), Crustacean: Dp - *Daphnia pulex* (water flea). The highly conserved histidine is marked in red.

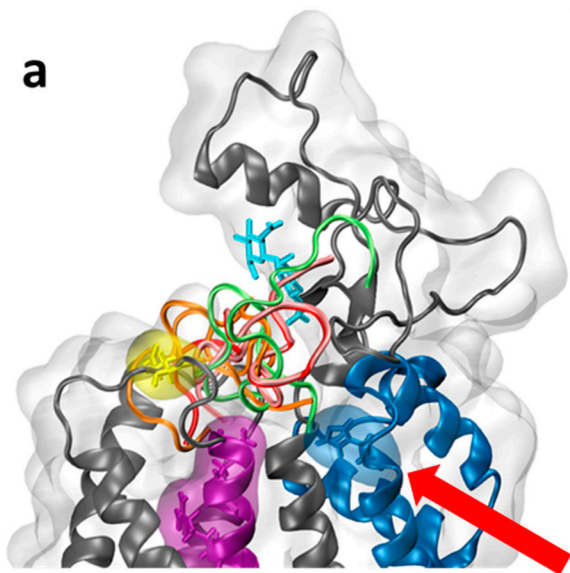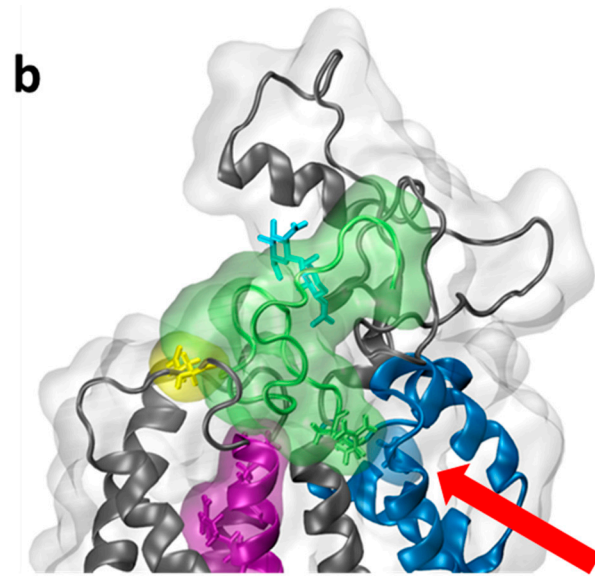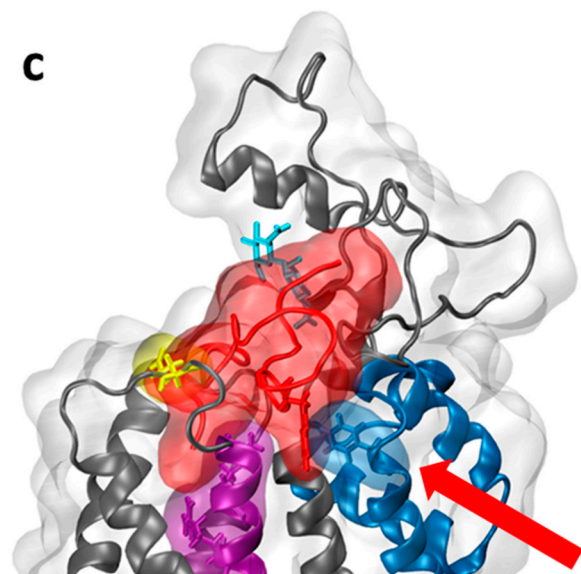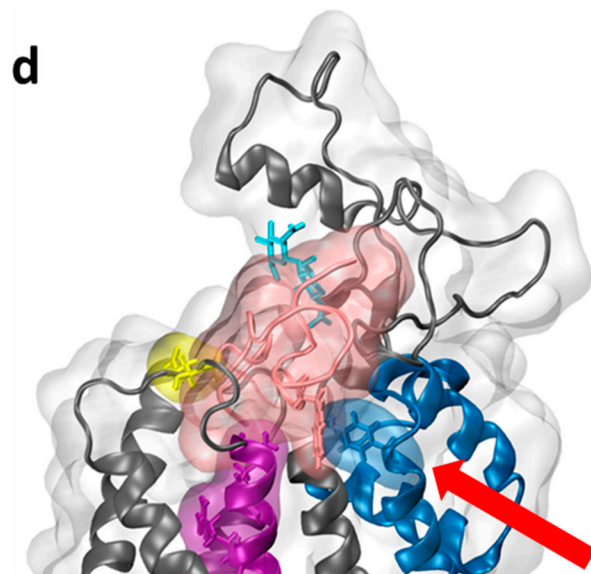



Figure S5. Representations of Av3 toxin binding modes to the site 3 of NavPaS channel H392X mutant variants. (a) the lowest energy poses of Av3 binding to NavPaS WT (orange) and H392 mutants. (b) Av3 (green) docked to the H392A (c) Av3 (red) docked to H392F (d) Av3 (pink) docked to H392Y. In purple helix S4 is presented, E1255 is shown in a yellow licorice and surface representation and NAG (N-acetylglucosamine) is depicted in cyan licorice. Pore forming region is in blue with H392X residues marked in licorice and surface representation and its position indicated by a red arrow.

Table S2. Parameters (\*) characterizing interactions of Av3 anemone toxin with NavPaS channel wild type (WT) and H392X mutant variants.

| <b>Parameter</b>           | <b>Av3 WT</b> | <b>Av3' WT</b> | <b>Av3 H392A</b> | <b>Av3 H392F</b> | <b>Av3 H392T</b> |
|----------------------------|---------------|----------------|------------------|------------------|------------------|
| SSF [kcal/mol]             | <b>-9.72</b>  | <b>-8.85</b>   | <b>-8.86</b>     | <b>-9.41</b>     | <b>-9.05</b>     |
| Total RRCS (AA)            | 152.80        | 145.90         | 151.31           | 145.81           | 157.49           |
| Total RRCS for NAG         | 13.90         | 2.53           | 19.18            | 24.12            | 22.34            |
| RRCS S4 only               | 21.84         | 6.51           | 36.08            | 8.86             | 16.61            |
| Toxin AA in interface [%]  | 85            | 78             | 92.6             | 85.2             | 88.9             |
| NAG atoms in interface [%] | 50            | 46             | 64.25            | 67.85            | 67.85            |
| ASA_TI [%]                 | 46            | 45             | 47.3             | 53.0             | 52.7             |
| ASA_NavI [%]               | 1.40          | 1.40           | 1.5              | 1.6              | 1.6              |
| % BSA Glu1255              | 43            | 89             | 55               | 54               | 47               |
| % BSA Arg1265 (S4)         | 94            | 31             | 60               | 70               | 92               |
| % BSA Arg1268 (S4)         | 83            | 22             | 0                | 83               | 51               |
| % BSA NAG                  | 25            | 20             | 27               | 26               | 27               |
| % BSA X392                 | 50            | 16             | 94               | 74               | 70               |

(\*) for definitions see main text

Table S3. Residue (# H392X NavPaS) - residue (#Av3 toxin) interactions responsible for anemone toxin binding to NavPaS mutant variants channel. Interaction types: pc -  $\pi$ -cation, sb – salt bridge, hbbb – hydrogen bond backbone-backbone, hbss – hydrogen bond side chain-side chain, hbsb – hydrogen bond side chain-backbone.

| H392A NavPaS |          | Av3      | H392F NavPaS |          | Av3      | H392Y NavPaS |          | Av3      |
|--------------|----------|----------|--------------|----------|----------|--------------|----------|----------|
|              |          |          | pc           | TYR 1192 | LYS 26   |              |          |          |
|              |          |          |              |          |          | sb           | ASP 1190 | LYS 26   |
|              |          |          |              |          |          | sb           | ASP 1190 | LYS 26   |
| hbbb         | CYS 337  | LYS 26   | hbsb         | SER 387  | TYR 7    | hbsb         | GLY 335  | ARG 1    |
| hbss         | SER 1260 | ASN 16   | hbsb         | TYR 1257 | ASN 16   | hbss         | ASP 1190 | LYS 26   |
| hbsb         | ASN 330  | VAL 27   | hbss         | GLN 286  | TYR 7    | hbsb         | CYS 337  | ARG 1    |
| hbsb         | ARG 1265 | PRO 12   | hbsb         | CYS 337  | ARG 1    | hbsb         | MET 281  | TYR 7    |
| hbsb         | LYS 1256 | PRO 19   | hbsb         | GLY 335  | ARG 1    | hbss         | ASN 330  | ARG 1    |
| hbsb         | ASN 330  | TYR 18   | hbsb         | SER 1199 | LYS 26   | hbsb         | GLN 345  | SER 23   |
| hbsb         | THR 1262 | ARG 1    | hbsb         | HIS 1191 | LYS 26   | hbsb         | GLY 329  | ARG 1    |
| hbbb         | ILE 279  | ARG 1    | hbsb         | SER 1199 | LYS 26   | hbsb         | CYS 337  | ARG 1    |
| hbsb         | AL388    | ARG 1    | hbsb         | CYS 337  | ARG 1    | hbsb         | MET 281  | TYR 7    |
| hbss         | GLN 286  | SER 2    | hbss         | ASN 330  | ARG 1    | hbsb         | THR 1262 | TYR 7    |
| hbsb         | ARG 1265 | PRO 12   | hbsb         | GLY 329  | ARG 1    | hbsb         | GLN 345  | SER 23   |
|              |          |          | hbsb         | THR 1262 | TYR 7    | hbsb         | GLY 329  | ARG 1    |
| hbls         | TYR 7    | NAG 1602 | hbsb         | GLN 1194 | PRO 25   | hbss         | ARG 1265 | VAL 27   |
| hbls         | TYR 7    | NAG 1601 | hbsb         | GLU 1255 | ASN 16   | hbss         | ASP 1190 | LYS 26   |
| hbls         | TYR 7    | NAG 1602 | hbsb         | GLY 329  | ARG 1    |              |          |          |
|              |          |          | hblb         | ARG 1    | NAG 1601 | hbls         | TYR 18   | NAG 1602 |
|              |          |          | hblb         | SER 2    | NAG 1601 | hbls         | TYR 18   | NAG 1601 |
|              |          |          | hbls         | TYR 18   | NAG 1602 | hblb         | SER 2    | NAG 1601 |
|              |          |          | hbls         | TYR 18   | NAG 1601 | hblb         | ARG 1    | NAG 1601 |
|              |          |          | hbls         | TYR 18   | NAG 1602 | hbls         | TYR 18   | NAG 1602 |

Table S4a. Residue-Residue Contact Score values for possible Av3 toxin-NavPaS channel H392X variants (amino acid residues) contacts.

| Av3    | NavPaS<br>H392A | RRCS            | Av3    | NavPaS<br>H392F | RRCS            | Av3    | NavPaS<br>H392T | RRCS            |
|--------|-----------------|-----------------|--------|-----------------|-----------------|--------|-----------------|-----------------|
|        |                 | $\Sigma=151.31$ |        |                 | $\Sigma=145.81$ |        |                 | $\Sigma=157.49$ |
| 15 GLN | 1262 THR        | 8.07            | 27 VAL | 1190 ASP        | 7.58            | 23 SER | 345 GLN         | 11.39           |
| 27 VAL | 330 ASN         | 8.00            | 1 ARG  | 337 CYS         | 5.98            | 1 ARG  | 337 CYS         | 7.75            |
| 1 ARG  | 279 ILE         | 7.95            | 19 PRO | 1255 GLU        | 5.54            | 16 ASN | 1257 TYR        | 7.73            |
| 16 ASN | 1260 SER        | 7.31            | 16 ASN | 1257 TYR        | 5.28            | 27 VAL | 1265 ARG        | 7.54            |
| 20 GLU | 1256 LYS        | 7.19            | 25 PRO | 1199 SER        | 4.71            | 19 PRO | 1255 GLU        | 7.38            |
| 18 TYR | 330 ASN         | 6.85            | 16 ASN | 1255 GLU        | 4.57            | 16 ASN | 1256 LYS        | 7.27            |
| 1 ARG  | 392 ALA         | 6.56            | 1 ARG  | 330 ASN         | 4.55            | 7 TYR  | 281 MET         | 5.92            |
| 16 ASN | 1257 TYR        | 5.74            | 7 TYR  | 388 ALA         | 4.42            | 7 TYR  | 279 ILE         | 5.67            |
| 1 ARG  | 388 ALA         | 5.54            | 25 PRO | 1194 GLN        | 4.29            | 27 VAL | 281 MET         | 5.07            |
| 8 TRP  | 1255 GLU        | 5.02            | 26 LYS | 1194 GLN        | 4.22            | 1 ARG  | 330 ASN         | 4.74            |
| 27 VAL | 336 MET         | 4.97            | 25 PRO | 1196 MET        | 4.22            | 1 ARG  | 329 GLY         | 4.65            |
| 19 PRO | 1256 LYS        | 4.72            | 26 LYS | 1199 SER        | 4.04            | 27 VAL | 278 GLN         | 4.51            |
| 25 PRO | 339 PRO         | 4.63            | 1 ARG  | 336 MET         | 3.95            | 5 PRO  | 331 SER         | 3.79            |
| 27 VAL | 329 GLY         | 3.96            | 27 VAL | 1202 LEU        | 3.84            | 12 PRO | 332 SER         | 3.69            |
| 13 TRP | 1192 TYR        | 3.56            | 1 ARG  | 329 GLY         | 3.74            | 7 TYR  | 1262 THR        | 3.59            |
| 19 PRO | 1257 TYR        | 3.54            | 13 TRP | 330 ASN         | 3.62            | 13 TRP | 332 SER         | 3.57            |
| 26 LYS | 337 CYS         | 3.49            | 7 TYR  | 283 VAL         | 3.59            | 26 LYS | 1199 SER        | 3.54            |
| 26 LYS | 336 MET         | 3.42            | 7 TYR  | 286 GLN         | 3.42            | 5 PRO  | 330 ASN         | 3.17            |
| 12 PRO | 1265 ARG        | 3.37            | 13 TRP | 332 SER         | 3.38            | 23 SER | 1192 TYR        | 3.12            |
| 1 ARG  | 280 TYR         | 3.22            | 7 TYR  | 1262 THR        | 3.24            | 8 TRP  | 392 TYR         | 2.91            |
| 15 GLN | 1260 SER        | 3.21            | 5 PRO  | 331 SER         | 3.04            | 26 LYS | 1190 ASP        | 2.89            |
| 16 ASN | 1259 ILE        | 3.06            | 12 PRO | 332 SER         | 2.94            | 1 ARG  | 343 CYS         | 2.88            |
| 13 TRP | 281 MET         | 2.66            | 8 TRP  | 392 PHE         | 2.87            | 25 PRO | 1192 TYR        | 2.75            |
| 25 PRO | 341 TYR         | 2.50            | 27 VAL | 1199 SER        | 2.83            | 13 TRP | 330 ASN         | 2.52            |

|        |          |      |        |          |      |        |          |      |
|--------|----------|------|--------|----------|------|--------|----------|------|
| 2 SER  | 388 ALA  | 2.44 | 13 TRP | 331 SER  | 2.82 | 13 TRP | 331 SER  | 2.42 |
| 14 GLY | 1262 THR | 2.44 | 27 VAL | 1203 ASP | 2.65 | 1 ARG  | 336 MET  | 2.30 |
| 2 SER  | 283 VAL  | 2.42 | 16 ASN | 1256 LYS | 2.41 | 7 TYR  | 278 GLN  | 2.20 |
| 11 CYS | 1261 PRO | 2.27 | 19 PRO | 1261 PRO | 2.40 | 20 GLU | 1261 PRO | 2.09 |
| 1 ARG  | 391 TRP  | 2.09 | 7 TYR  | 387 SER  | 2.23 | 25 PRO | 1194 GLN | 2.07 |
| 14 GLY | 1261 PRO | 2.00 | 23 SER | 1192 TYR | 2.08 | 19 PRO | 1261 PRO | 1.92 |
| 3 CYS  | 331 SER  | 1.75 | 26 LYS | 281 MET  | 2.01 | 1 ARG  | 335 GLY  | 1.85 |
| 1 ARG  | 1262 THR | 1.64 | 5 PRO  | 330 ASN  | 2.01 | 3 CYS  | 330 ASN  | 1.85 |
| 16 ASN | 1261 PRO | 1.60 | 25 PRO | 1195 SER | 1.98 | 24 GLY | 1192 TYR | 1.83 |
| 2 SER  | 286 GLN  | 1.53 | 3 CYS  | 330 ASN  | 1.94 | 7 TYR  | 283 VAL  | 1.78 |
| 27 VAL | 331 SER  | 1.34 | 7 TYR  | 392 PHE  | 1.90 | 26 LYS | 1194 GLN | 1.65 |
| 15 GLN | 1261 PRO | 1.34 | 8 TRP  | 1262 THR | 1.85 | 7 TYR  | 1265 ARG | 1.63 |
| 10 GLY | 1255 GLU | 1.33 | 1 ARG  | 335 GLY  | 1.83 | 27 VAL | 1190 ASP | 1.54 |
| 12 PRO | 1261 PRO | 1.20 | 1 ARG  | 343 CYS  | 1.80 | 26 LYS | 1203 ASP | 1.35 |
| 1 ARG  | 389 GLY  | 0.92 | 26 LYS | 1191 HIS | 1.63 | 7 TYR  | 392 TYR  | 1.15 |
| 2 SER  | 331 SER  | 0.89 | 27 VAL | 278 GLN  | 1.62 | 4 CYS  | 330 ASN  | 1.12 |
| 27 VAL | 334 ALA  | 0.76 | 26 LYS | 1192 TYR | 1.39 | 8 TRP  | 1262 THR | 1.11 |
| 27 VAL | 335 GLY  | 0.74 | 27 VAL | 1194 GLN | 1.37 | 1 ARG  | 341 TYR  | 1.08 |
| 25 PRO | 338 PRO  | 0.73 | 27 VAL | 1265 ARG | 1.30 | 16 ASN | 1255 GLU | 0.88 |
| 25 PRO | 291 HIS  | 0.65 | 20 GLU | 1255 GLU | 1.18 | 10 GLY | 1257 TYR | 0.84 |
| 2 SER  | 279 ILE  | 0.65 | 26 LYS | 1203 ASP | 1.03 | 25 PRO | 1191 HIS | 0.84 |
| 25 PRO | 337 CYS  | 0.51 | 1 ARG  | 341 TYR  | 0.97 | 7 TYR  | 280 TYR  | 0.82 |
| 13 TRP | 345 GLN  | 0.48 | 10 GLY | 1257 TYR | 0.92 | 1 ARG  | 328 CYS  | 0.77 |
| 14 GLY | 1265 ARG | 0.30 | 26 LYS | 1193 GLY | 0.88 | 25 PRO | 281 MET  | 0.75 |
| 23 SER | 330 ASN  | 0.13 | 4 CYS  | 330 ASN  | 0.88 | 1 ARG  | 342 THR  | 0.67 |
| 26 LYS | 339 PRO  | 0.13 | 11 CYS | 331 SER  | 0.71 | 11 CYS | 331 SER  | 0.53 |
| 2 SER  | 345 GLN  | 0.13 | 15 GLN | 1256 LYS | 0.59 | 15 GLN | 1256 LYS | 0.53 |
| 3 CYS  | 388 ALA  | 0.12 | 2 SER  | 330 ASN  | 0.56 | 11 CYS | 330 ASN  | 0.38 |
| 9 GLY  | 1255 GLU | 0.10 | 1 ARG  | 342 THR  | 0.41 | 20 GLU | 1265 ARG | 0.35 |
| 17 CYS | 331 SER  | 0.07 | 11 CYS | 330 ASN  | 0.32 | 2 SER  | 330 ASN  | 0.33 |
| 16 ASN | 1255 GLU | 0.04 | 13 TRP | 329 GLY  | 0.20 | 26 LYS | 1265 ARG | 0.30 |

|        |          |      |       |          |      |        |          |      |
|--------|----------|------|-------|----------|------|--------|----------|------|
| 5 PRO  | 330 ASN  | 0.03 | 6 CYS | 1261 PRO | 0.07 | 13 TRP | 329 GLY  | 0.17 |
| 10 GLY | 1261 PRO | 0.02 |       |          |      | 27 VAL | 1194 GLN | 0.14 |
|        |          |      |       |          |      | 11 CYS | 332 SER  | 0.11 |
|        |          |      |       |          |      | 8 TRP  | 331 SER  | 0.09 |

Table S4b. Residue-Residue Contact Score values for possible toxin-NavPaS channel NAG contacts.

| <b>Av3</b>     | <b>NAG</b> | <b>RRCS</b> | <b>Av3</b>     | <b>NAG</b> | <b>RRCS</b> | <b>Av3</b>     | <b>NAG</b> | <b>RRCS</b> |
|----------------|------------|-------------|----------------|------------|-------------|----------------|------------|-------------|
| $\Sigma=19.18$ |            |             | $\Sigma=24.12$ |            |             | $\Sigma=22.34$ |            |             |
| 7 TYR          | 1601 NAG   | 6.09        | 2 SER          | 1601 NAG   | 8.48        | 2 SER          | 1601 NAG   | 7.40        |
| 7 TYR          | 1602 NAG   | 5.45        | 18 TYR         | 1601 NAG   | 7.48        | 18 TYR         | 1601 NAG   | 7.38        |
| 5 PRO          | 1601 NAG   | 5.29        | 1 ARG          | 1601 NAG   | 2.60        | 1 ARG          | 1601 NAG   | 2.32        |
| 23 SER         | 1601 NAG   | 1.62        | 18 TYR         | 1602 NAG   | 2.39        | 18 TYR         | 1602 NAG   | 2.32        |
| 4 CYS          | 1601 NAG   | 0.26        | 3 CYS          | 1601 NAG   | 1.40        | 3 CYS          | 1601 NAG   | 1.33        |
| 3 CYS          | 1601 NAG   | 0.23        | 5 PRO          | 1601 NAG   | 1.33        | 5 PRO          | 1601 NAG   | 1.15        |
| 6 CYS          | 1601 NAG   | 0.12        | 6 CYS          | 1601 NAG   | 0.44        | 6 CYS          | 1601 NAG   | 0.44        |
| 24 GLY         | 1601 NAG   | 0.12        |                |            |             |                |            |             |

Table S5. Values of SMINA Scoring Function [kcal/mol] for anemones toxins binding to NavPaS channel variants (the lowest energy poses of 5 repetitions up to 100 poses).

| <b>Channel variant</b> | <b>Av1</b>   | <b>Av2</b>   | <b>Av3</b>   | <b>CgNa</b>  |
|------------------------|--------------|--------------|--------------|--------------|
| <b>WT</b>              | <b>-4.89</b> | <b>-4.98</b> | <b>-9.72</b> | <b>-5.53</b> |
| <b>D1252E</b>          | -            | -4.81        | -8.88        | -5.48        |
| <b>D1252R</b>          | -            | -4.66        | -8.95        | -5.81        |
| <b>D1252A</b>          | -            | -4.90        | -9.30        | -5.49        |
